# Supplementary material
Source: publisher figshare collection journal article supplement (https://tandf.figshare.com/ndownloader/files/12997022)
Supplement: Supplementary file 1 [file 12997022]

| Supplemental Table 1. Clinicopathological features in patients with NMIBC and healthy controls |               |                          |
|------------------------------------------------------------------------------------------------|---------------|--------------------------|
| Variables                                                                                      | NMIBC (n = 9) | Healthy controls (n = 8) |
| Median age, years (IQR)                                                                        | 67 (65–75)    | 62 (59–66)               |
| Follow-up, months (IQR)                                                                        | 51 (39–60)    |                          |
| Sex, n (%)                                                                                     |               |                          |
| Male                                                                                           | 7 (78)        | 5 (63)                   |
| Female                                                                                         | 2 (22)        | 3 (37)                   |
| T stage, n (%)                                                                                 |               |                          |
| Ta                                                                                             | 9 (100)       |                          |
| NMIBC: non-muscle-invasive bladder cancer                                                      |               |                          |
